# Supplementary material
Source: PubMed Central journal article supplement (PMC2822630)
Supplement: awp314_1.pdf [file awp314_1.pdf]

# Supplementary Table 1. Tissue levels of catecholamines and their metabolites in the dorsal and ventral striatum, measured using HPLC-EC

doi:10.1093/brain/awp314

Title: Optimized rAAV5-mediated striatal DOPA delivery restores complex sensorimotor function and prevents dyskinesias in a model of advanced Parkinson's disease

Authors: T. Björklund, T. Carlsson, E. Ahlm Cederfjäll, M. Carta and D. Kirik

| Group                               | Striatal region | BH4 <sup>1</sup> |               | DOPA <sup>1</sup> |                | DA <sup>2</sup> |                 | DOPAC <sup>1</sup> |                | HVA <sup>1</sup> |               | DOPAC/DA ratio |                | 3-OMD <sup>1</sup> |              | 5-HT <sup>1</sup> |               | 5-HIAA <sup>1</sup> |               | 5-HIAA/5-HT ratio |                 |
|-------------------------------------|-----------------|------------------|---------------|-------------------|----------------|-----------------|-----------------|--------------------|----------------|------------------|---------------|----------------|----------------|--------------------|--------------|-------------------|---------------|---------------------|---------------|-------------------|-----------------|
|                                     |                 | L                | R             | L                 | R              | L               | R               | L                  | R              | L                | R             | L              | R              | L                  | R            | L                 | R             | L                   | R             | L                 | R               |
| Intact ctrl                         | Dorsal          | 1036<br>± 66     | 995<br>± 64   | ND                | ND             | 72.19<br>± 1.74 | 70.61<br>± 2.98 | 12741<br>± 604     | 13938<br>± 802 | 3489<br>± 159    | 3504<br>± 136 | 0.18<br>± 0.01 | 0.20<br>± 0.01 | ND                 | ND           | 1796<br>± 179     | 1598<br>± 211 | 1587<br>± 88        | 1287<br>± 180 | 0.90<br>± 0.05    | 0.80<br>± 0.04  |
|                                     | Ventral         | 677<br>± 31      | 670<br>± 25   | ND                | 288<br>± 126   | 40.12<br>± 1.37 | 35.36<br>± 2.66 | 8348<br>± 371      | 9237<br>± 970  | 2100<br>± 84     | 1953<br>± 182 | 0.21<br>± 0.01 | 0.26<br>± 0.02 | ND                 | ND           | 5021<br>± 175     | 3491<br>± 445 | 979<br>± 44         | 1089<br>± 245 | 0.20<br>± 0.01    | 0.32<br>± 0.08  |
|                                     | Total           | 908<br>± 37      | 879<br>± 52   | ND                | 92<br>± 35     | 59.96<br>± 1.05 | 57.50<br>± 1.46 | 11064<br>± 420     | 12196<br>± 864 | 2964<br>± 132    | 2928<br>± 146 | 0.19<br>± 0.01 | 0.22<br>± 0.01 | ND                 | ND           | 3030<br>± 173     | 2236<br>± 186 | 1359<br>± 65        | 1198<br>± 138 | 0.63<br>± 0.03    | 0.63<br>± 0.05  |
| 6-OHDA                              | Dorsal          | 1092<br>± 37     | 151<br>± 30   | ND                | 97<br>± 10     | 69.08<br>± 2.38 | 0.16<br>± 0.03  | 14696<br>± 1096    | 311<br>± 42    | 3626<br>± 334    | 93<br>± 11    | 0.21<br>± 0.02 | 2.43<br>± 0.56 | ND                 | 423<br>± 27  | 1729<br>± 128     | 2638<br>± 336 | 1680<br>± 113       | 1370<br>± 155 | 0.98<br>± 0.04    | 0.53<br>± 0.02  |
|                                     | Ventral         | 641<br>± 40      | 156<br>± 20   | ND                | 283<br>± 17    | 32.35<br>± 1.69 | 1.02<br>± 0.31  | 7790<br>± 637      | 449<br>± 89    | 1933<br>± 200    | 112<br>± 22   | 0.24<br>± 0.01 | 0.55<br>± 0.08 | ND                 | 364<br>± 14  | 4268<br>± 311     | 4583<br>± 594 | 1000<br>± 91        | 1090<br>± 122 | 0.23<br>± 0.01    | 0.25<br>± 0.03  |
|                                     | Total           | 938<br>± 33      | 153<br>± 25   | ND                | 165<br>± 8     | 56.47<br>± 2.11 | 0.48<br>± 0.14  | 12341<br>± 868     | 363<br>± 55    | 3055<br>± 297    | 102<br>± 13   | 0.22<br>± 0.01 | 1.77<br>± 0.37 | ND                 | 228<br>± 49  | 2604<br>± 179     | 3320<br>± 392 | 1445<br>± 99        | 1264<br>± 129 | 0.72<br>± 0.03    | 0.43<br>± 0.02  |
| 6-OHDA/<br>rAAV-GCH1                | Dorsal          | 1221<br>± 74     | 8414<br>± 979 | ND                | 93<br>± 5      | 71.43<br>± 3.33 | 0.40<br>± 0.20  | 14391<br>± 1321    | 748<br>± 392   | 3724<br>± 289    | 137<br>± 40   | 0.20<br>± 0.01 | 4.66<br>± 3.57 | ND                 | 258<br>± 62  | 1565<br>± 76      | 3164<br>± 286 | 1496<br>± 66        | 1725<br>± 162 | 0.97<br>± 0.07    | 0.55<br>± 0.02  |
|                                     | Ventral         | 822<br>± 43      | 2643<br>± 318 | ND                | 268<br>± 19    | 31.67<br>± 2.12 | 1.33<br>± 0.36  | 7167<br>± 414      | 554<br>± 102   | 1824<br>± 118    | 136<br>± 19   | 0.23<br>± 0.01 | 0.56<br>± 0.08 | ND                 | 393<br>± 18  | 4301<br>± 204     | 4790<br>± 534 | 967<br>± 46         | 1083<br>± 104 | 0.23<br>± 0.01    | 0.23<br>± 0.02  |
|                                     | Total           | 1070<br>± 49     | 6144<br>± 725 | ND                | 159<br>± 6     | 56.43<br>± 2.74 | 0.74<br>± 0.15  | 11686<br>± 959     | 685<br>± 252   | 2999<br>± 207    | 135<br>± 26   | 0.21<br>± 0.01 | 3.31<br>± 2.46 | ND                 | 210<br>± 27  | 2596<br>± 142     | 3804<br>± 358 | 1307<br>± 53        | 1465<br>± 130 | 0.70<br>± 0.05    | 0.43<br>± 0.02  |
| 6-OHDA/<br>rAAV-TH+GCH1             | Dorsal          | 1090<br>± 63     | 2086<br>± 233 | ND                | 8003<br>± 956  | 63.92<br>± 2.82 | 2.09<br>± 0.41  | 12421<br>± 853     | 3374<br>± 406  | 3048<br>± 200    | 2428<br>± 300 | 0.20<br>± 0.01 | 1.75<br>± 0.15 | ND                 | 801<br>± 121 | 1527<br>± 120     | 1839<br>± 251 | 1502<br>± 74        | 1484<br>± 170 | 1.01<br>± 0.06    | 0.84<br>± 0.04  |
|                                     | Ventral         | 738<br>± 69      | 863<br>± 208  | 50<br>± 50        | 1511<br>± 412  | 33.39<br>± 1.68 | 1.85<br>± 0.51  | 7442<br>± 565      | 1126<br>± 256  | 1797<br>± 152    | 458<br>± 95   | 0.22<br>± 0.01 | 0.71<br>± 0.10 | ND                 | 471<br>± 40  | 4144<br>± 169     | 3547<br>± 588 | 1031<br>± 73        | 1005<br>± 93  | 0.25<br>± 0.01    | 0.35<br>± 0.06  |
|                                     | Total           | 971<br>± 40      | 1655<br>± 142 | 31<br>± 31        | 5731<br>± 573  | 53.91<br>± 1.79 | 2.00<br>± 0.43  | 10729<br>± 612     | 2573<br>± 255  | 2639<br>± 177    | 1730<br>± 175 | 0.20<br>± 0.01 | 1.40<br>± 0.12 | ND                 | 682<br>± 77  | 2341<br>± 103     | 2412<br>± 351 | 1345<br>± 61        | 1307<br>± 127 | 0.77<br>± 0.05    | 0.67<br>± 0.04  |
| 6-OHDA/<br>rAAV-TH+GCH1/<br>5,7-DHT | Dorsal          | 1085<br>± 97     | 1615<br>± 466 | ND                | 8258<br>± 1741 | 66.85<br>± 3.79 | 2.39<br>± 1.41  | 11833<br>± 1008    | 3500<br>± 1102 | 3352<br>± 205    | 2452<br>± 723 | 0.18<br>± 0.01 | 1.97<br>± 0.43 | ND                 | 844<br>± 126 | 1575<br>± 116     | 24<br>± 10    | 1548<br>± 119       | 150<br>± 34   | 0.98<br>± 0.02    | 14.14<br>± 5.50 |
|                                     | Ventral         | 768<br>± 62      | 1307<br>± 648 | ND                | 2477<br>± 1156 | 34.51<br>± 1.04 | 2.18<br>± 1.36  | 7851<br>± 473      | 1588<br>± 650  | 1921<br>± 91     | 798<br>± 367  | 0.23<br>± 0.01 | 1.13<br>± 0.42 | ND                 | 616<br>± 97  | 3640<br>± 578     | 87<br>± 24    | 996<br>± 83         | 710<br>± 127  | 0.35<br>± 0.12    | 11.30<br>± 2.58 |
|                                     | Total           | 977<br>± 84      | 1512<br>± 502 | ND                | 6255<br>± 1360 | 55.66<br>± 3.06 | 2.32<br>± 1.39  | 10461<br>± 880     | 2843<br>± 910  | 2851<br>± 177    | 1880<br>± 554 | 0.19<br>± 0.01 | 1.68<br>± 0.37 | ND                 | 763<br>± 92  | 2337<br>± 194     | 45<br>± 13    | 1355<br>± 99        | 342<br>± 47   | 0.75<br>± 0.06    | 13.11<br>± 4.36 |
| 6-OHDA/<br>5,7-DHT                  | Dorsal          | 962<br>± 31      | 17<br>± 3     | ND                | 58<br>± 25     | 66.44<br>± 6.48 | 0.17<br>± 0.05  | 13308<br>± 2534    | 105<br>± 14    | 3408<br>± 682    | 50<br>± 17    | 0.20<br>± 0.02 | 0.87<br>± 0.38 | ND                 | 166<br>± 87  | 1975<br>± 104     | 51<br>± 16    | 2245<br>± 399       | 162<br>± 43   | 1.15<br>± 0.23    | 3.40<br>± 0.42  |
|                                     | Ventral         | 645<br>± 111     | 52<br>± 23    | ND                | 146<br>± 70    | 28.80<br>± 0.69 | 0.53<br>± 0.17  | 8003<br>± 2081     | 258<br>± 134   | 1615<br>± 265    | 138<br>± 7    | 0.28<br>± 0.07 | 0.42<br>± 0.11 | ND                 | 261<br>± 109 | 3676<br>± 1125    | 141<br>± 53   | 908<br>± 61         | 477<br>± 259  | 0.35<br>± 0.18    | 7.46<br>± 6.25  |
|                                     | Total           | 857<br>± 28      | 26<br>± 3     | ND                | 83<br>± 34     | 53.55<br>± 4.67 | 0.28<br>± 0.07  | 11530<br>± 2214    | 144<br>± 41    | 2784<br>± 510    | 81<br>± 13    | 0.23<br>± 0.04 | 0.68<br>± 0.20 | ND                 | 193<br>± 92  | 2568<br>± 338     | 80<br>± 29    | 1772<br>± 236       | 289<br>± 93   | 0.87<br>± 0.11    | 5.18<br>± 2.75  |

<sup>1</sup> fmol/mg tissue; <sup>2</sup> pmol/mg tissue; L = left striatum, contralateral to lesion; R = right striatum, ipsilateral to lesion; ND = not determined
